# Supplementary material
Source: publisher site journal article supplement (https://www.dovepress.com/get_supplementary_file.php?f=413256.docx)
Supplement: Supplementary file 1 [file get_supplementary_file.php]

**Supplementary Table 1. Scoring criteria used in the study**

| **Score** | **Criteria** |
| --- | --- |
| 0 | No foci of necrotizing myocarditis and inflammatory cell infiltration |
| +1 | Small infiltration of inflammatory cells (2-5 cells), such as lymphocytes and macrophages, between the myocardial muscle fibers. No necrosis or bleeding between the myocardial fibers was observed. |
| +2 | Up to three (≤3) foci of necrotizing myocarditis, characterized by inflammatory cell infiltration (> 5 cells), accompanied by myocardial necrosis and bleeding between the myocardial fibers, were observed. |
| +3 | Five to ten (5-10) foci of necrotizing myocarditis, characterized by inflammatory cell infiltration (> 5 cells), accompanied by myocardial necrosis and bleeding between the myocardial fibers, were observed. |
| +4 | More than ten (>10) foci of necrotizing myocarditis, characterized by inflammatory cell infiltration (> 5 cells), accompanied by myocardial necrosis and bleeding between the myocardial fibers, were observed. |

**Supplementary Table 2. Primers used to determine the expressions of caspase-3, Nrf2, PGC-1α and SOD2.**

| **Gene** | **Sequence (5’ 🡪 3’)** | |
| --- | --- | --- |
| β-actin1 | Forward  Reverse | TGTTGTCCCTGTATGCCTCT  AGCATGATGGACTTGGAATTG |
| Caspase-32 | Forward  Reverse | CTGACTGGAAAGCCGAAACT  GTTCCACTGTCTGTCTCAATACC |
| Nrf23 | Forward  Reverse | CCTCCAAAGGATGTCAATCAA  AGCATGATGGACTTGGAATTG |
| PGC-1α1 | Forward  Reverse | ATGTGTCGCCTTCTTGCTCT  ATCTACTGCCTGGGGACCTT |
| SOD24 | Forward  Reverse | AGGGCCTGTCCCATGATGTC  AGAAACCCGTTTGCCTCTACTGAA |

**Supplementary Table 3. Primers used in for the determination of mitochondrial DNA copy number**

| **Gene** | **Sequence (5’ 🡪 3’)** | |
| --- | --- | --- |
| β-actin5 | Forward  Reverse | AGCGAGCCGGAGCCAATCAG  TGCGCCGCCGGGTTTTATAGG |
| COII5 | Forward  Reverse | TGAGCCATCCCTTCACTAGG  TGAGCCGCAAATTTCAGAG |

**References**

1. Barinda AJ, Arozal W, Sandhiutami NMD, et al. Curcumin Prevents Epithelial-to Mesenchymal Transition-Mediated Ovarian Cancer Progression through NRF2/ETBR/ET-1 Axis and Preserves Mitochondria Biogenesis in Kidney after Cisplatin Administration. *Advanced pharmaceutical bulletin.* 2022;12(1):128.

2. Khan V, Sharma S, Bhandari U, Sharma N, Rishi V, Haque SE. Suppression of isoproterenol-induced cardiotoxicity in rats by raspberry ketone via activation of peroxisome proliferator activated receptor-α. *European Journal of Pharmacology.* 2019;842:157-166.

3. Melva Louisa AMP, Antasena A. Sidqi, Dimas Kirana Mahaputra, Ekida R. Firmansyah, Muhammad F. Ammar, Natasha Talya, Ni Nyoman Berlian Aryadevi, Ni Made Dwi Sandhiutami, Dewi Sukmawati, Vivian Soetikno. *Attenuation of cisplatin-induced hepatotoxicity by nanocurcumin through modulation of antioxidative and anti-inflammatory pathways.* Vol Volume: 13: issue: 3; 2023.

4. Zhao H, Liu J, Pan S, et al. SOD mRNA and MDA expression in rectus femoris muscle of rats with different eccentric exercise programs and time points. *PLoS One.* 2013;8(9):e73634.

5. Santos JM, Kowluru RA. Role of mitochondria biogenesis in the metabolic memory associated with the continued progression of diabetic retinopathy and its regulation by lipoic acid. *Investigative ophthalmology & visual science.* 2011;52(12):8791-8798.
